# Supplementary material
Source: Springer Nature journal article supplement (https://www.springermedizin.de/resource/supplementary/12884_2009_295_MOESM3_ESM.pdf/9457396)
Supplement: MOESM3 [file 9457396]

# District Public Health Office

CB-MNC Program

FCHV Form

FCHV No: \_\_\_\_\_ FCHV Name: \_\_\_\_\_ VDC: \_\_\_\_\_ Ward#: \_\_\_\_\_

Pregnant Women Name: \_\_\_\_\_ Oppressed

## ANC Period

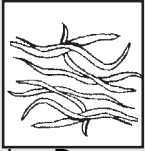

Taken Deworming tabs

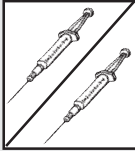

Taken TT vaccination

| Month |     |     |     |     |     |
|-------|-----|-----|-----|-----|-----|
| 4th   | 5th | 6th | 7th | 8th | 9th |
|       |     |     |     |     |     |

Taken Iron Tablets (30 tabs/month)

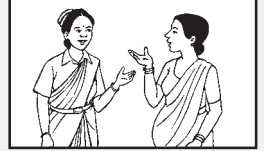

Identification of health worker or health institution

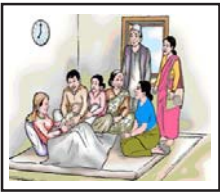

Counselling on use of MSC

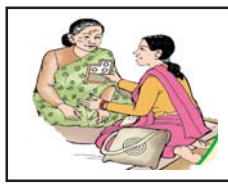

Received MSC Tablets after 8 months of delivery

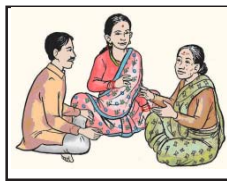

Antenatal Counselling Content Covered

Date of birth

\_\_\_\_ Day  
\_\_\_\_ Month  
\_\_\_\_ Year

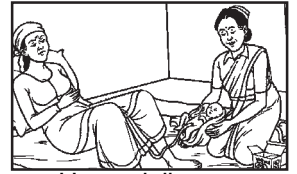

Home delivery assisted by health worker/delivery at health facility

## Post-Partum and Newborn Care

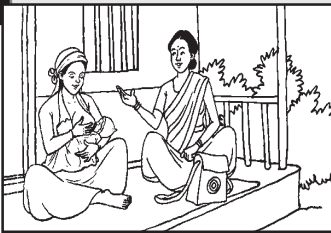

FCHV Visited

Within 2 days

Beyond 2 days

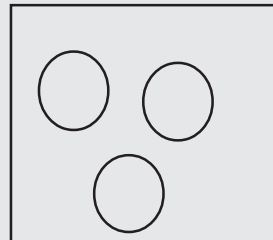

Took all MSC tablets

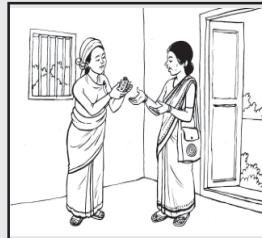

If not taken returned MSC tablets

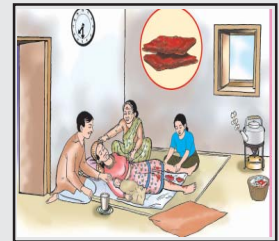

Heavy bleeding

## USE of MSC

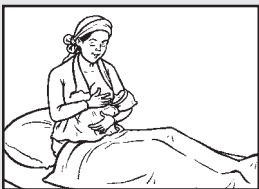

Healthy mother

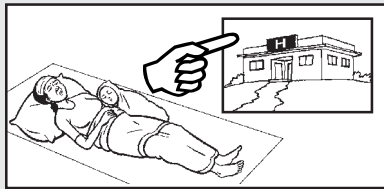

Mother with danger sign referred

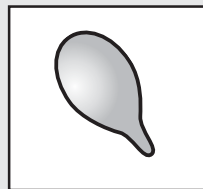

Given Vit A to mother

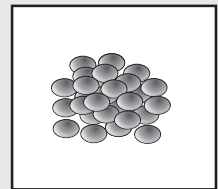

Given Iron to mother (45 tabs)

Date of form closed:

\_\_\_\_ day \_\_\_\_ Month \_\_\_\_ Year

(Close the form after 8 days of delivery)
